# Supplementary material
Source: Springer Nature journal article supplement (https://www.springermedizin.de/resource/supplementary/12913_2012_2450_MOESM1_ESM.pdf/9529972)

**Figure 1: Study Flow Diagram**

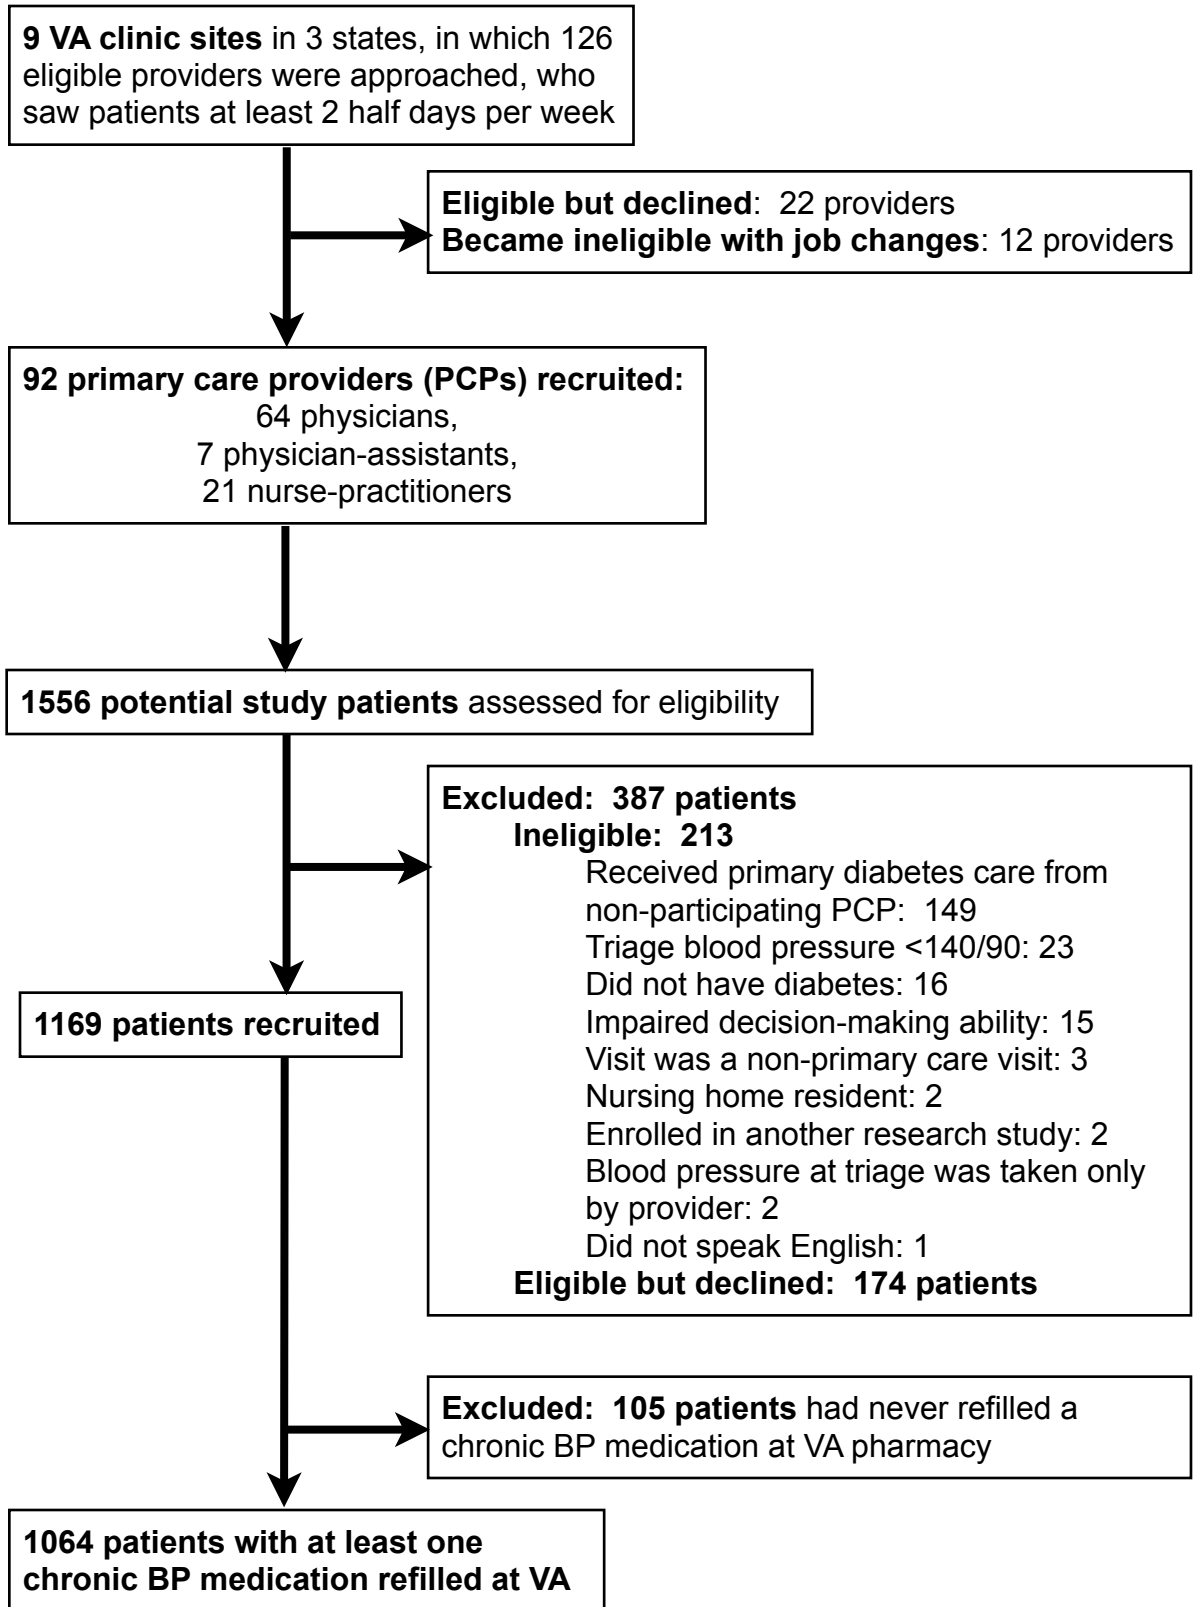

Supplement: MOESM1 [file 9529972]
